# Supplementary material for: Caspase-4 mediates cytoplasmic accumulation of TDP-43 in the primate brains
Source: Springer Nature journal article supplement (doi:10.1007/s00401-019-01979-0), 2019-02-27
Supplement: MOESM1 [file 16513500]

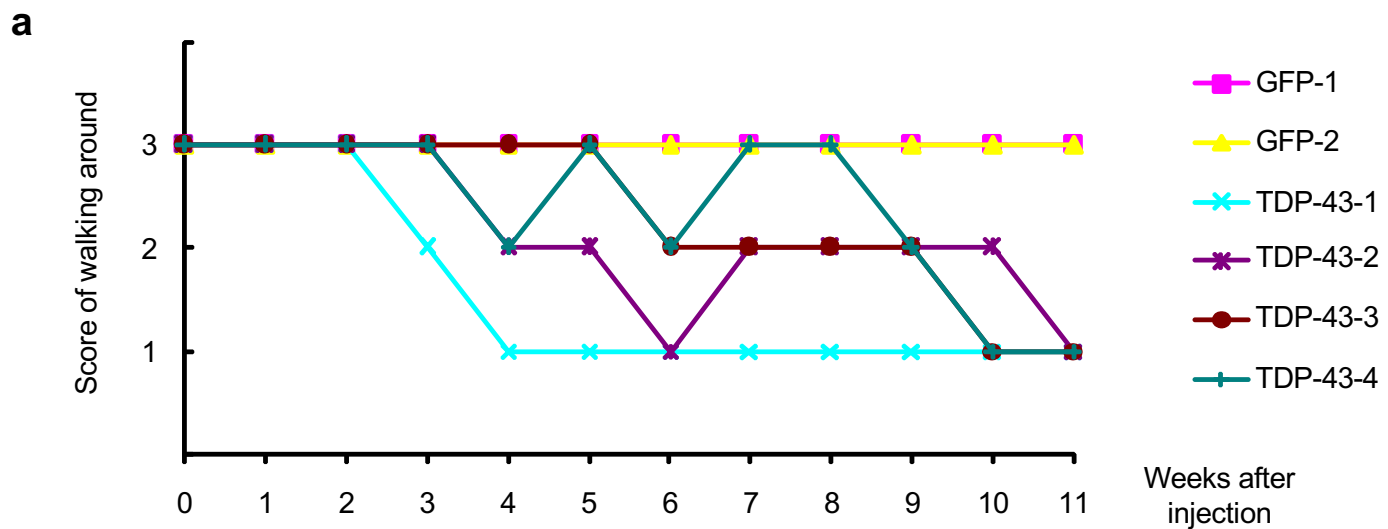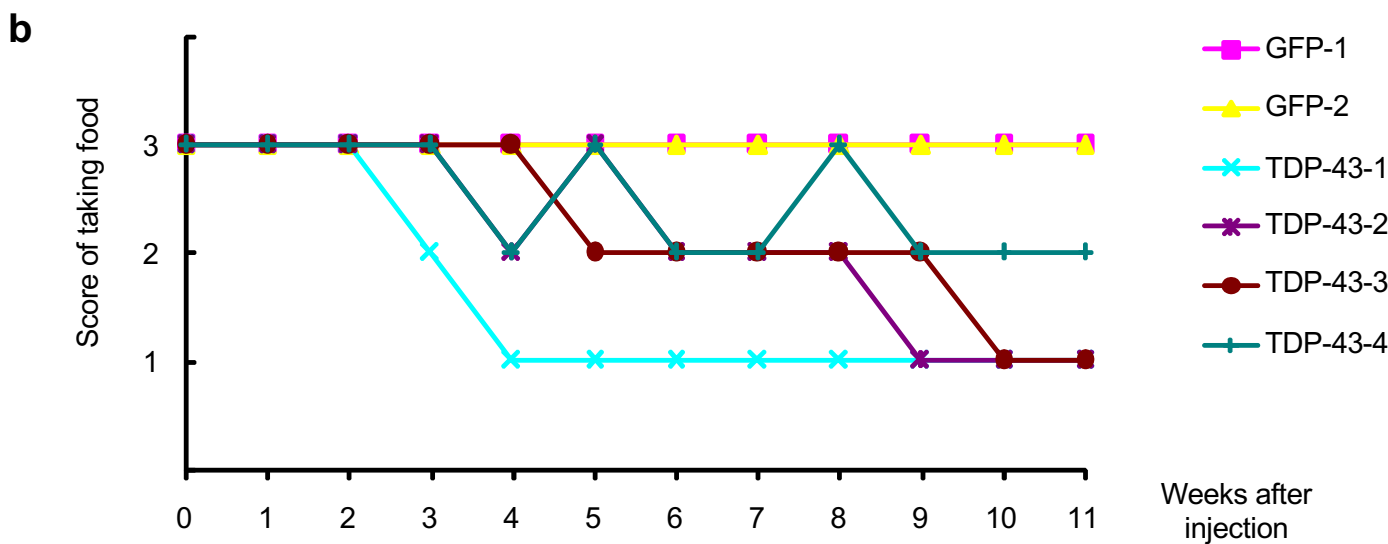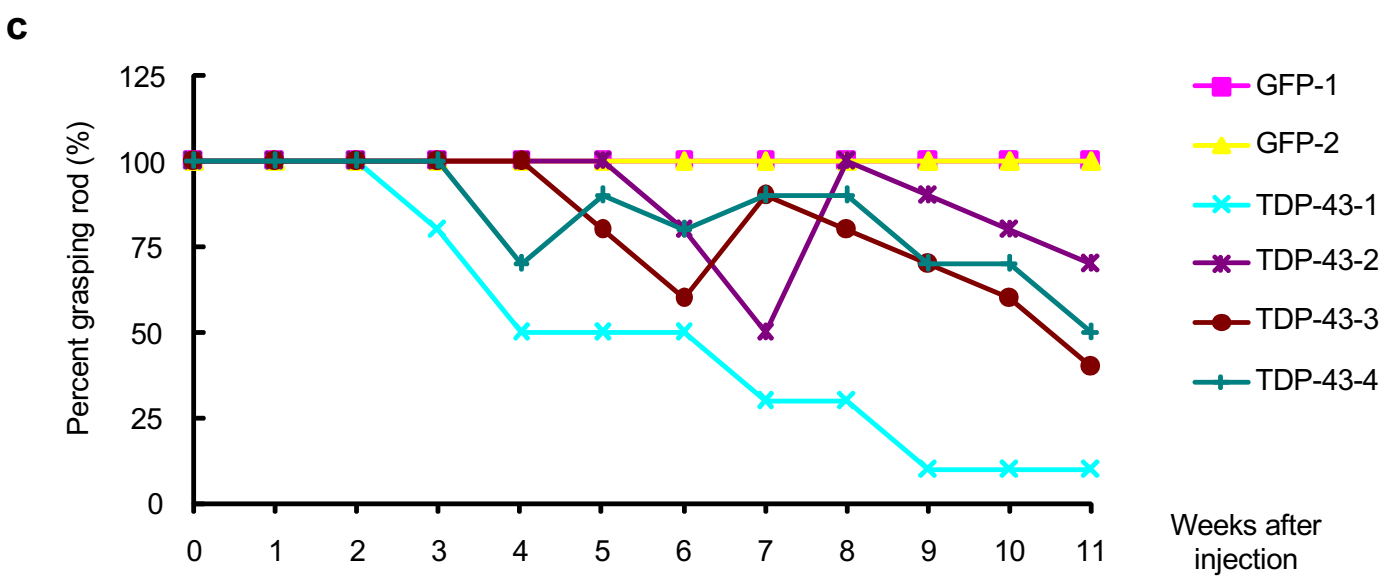

**Supplemental Fig. 1 Reduced movements and upper limb grasping in monkeys injected with AAV-TDP-43 in the right side of the substantia nigra.** The scores of walking around (a) and using the left upper hand for taking food (b), and the frequency of grasping a rod (c). The animals were examined six times on the same day in different weeks after injection of AAV-TDP-43. AAV-GFP injection served as a control. A score of 3 indicates that the monkeys can freely walk around or take food using either the left or right hand; the score 2 indicates that monkeys had difficulty walking or grasping when the left hand was used, and frequently used the right hand to take food; The score 1 indicates that monkeys lost the support from the left hand when walking, and could not raise the left hand to take food or grasp the ceiling fence or a test rod.

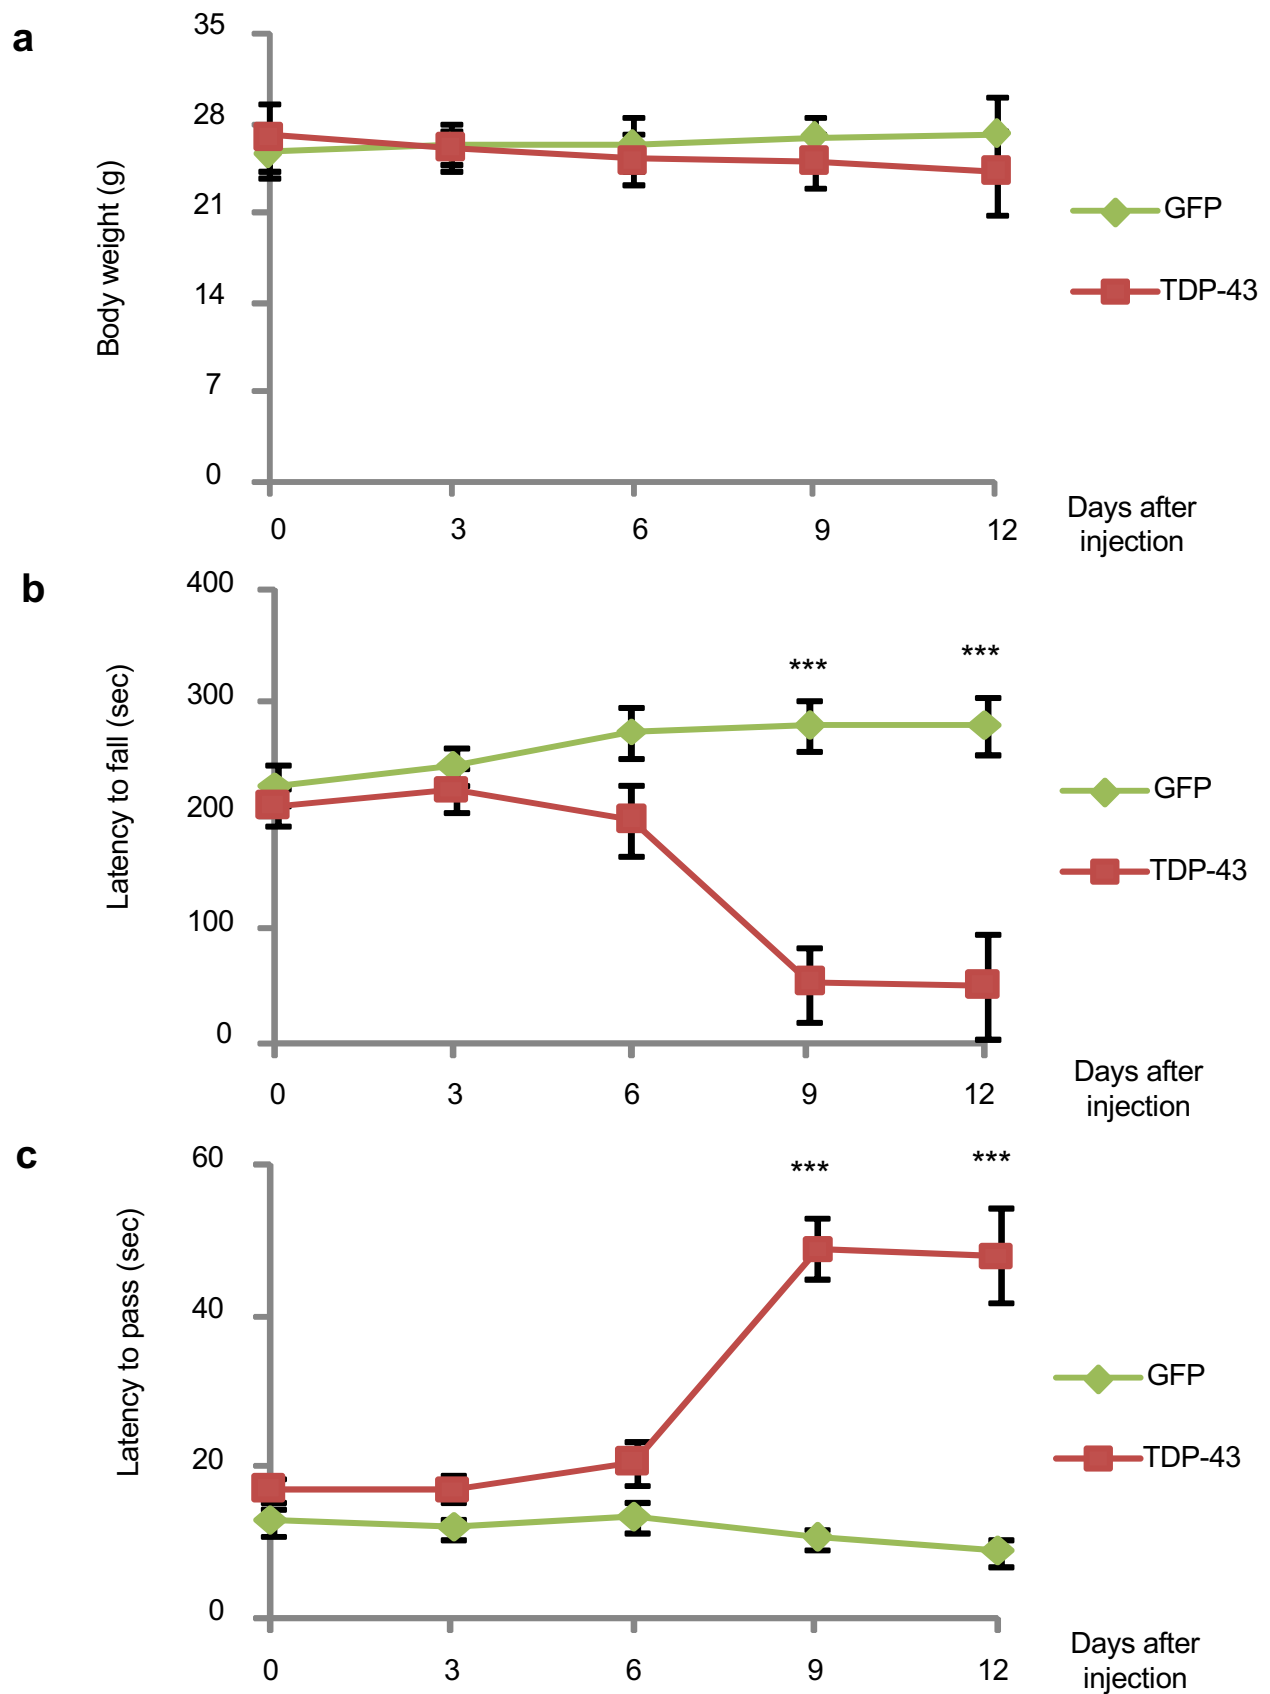

**Supplemental Fig. 2 Reduced motor function in mice injected with AAV-TDP-43 in the right side of the substantia nigra.** The body weight (a), rotarod performance (b), and balance beam test (c) were recorded at different days after injection. AAV-GFP injection served as a control (n=12 mice per group for AAV-GFP and TDP-43 injection, \*\*\*  $P < 0.001$ ).

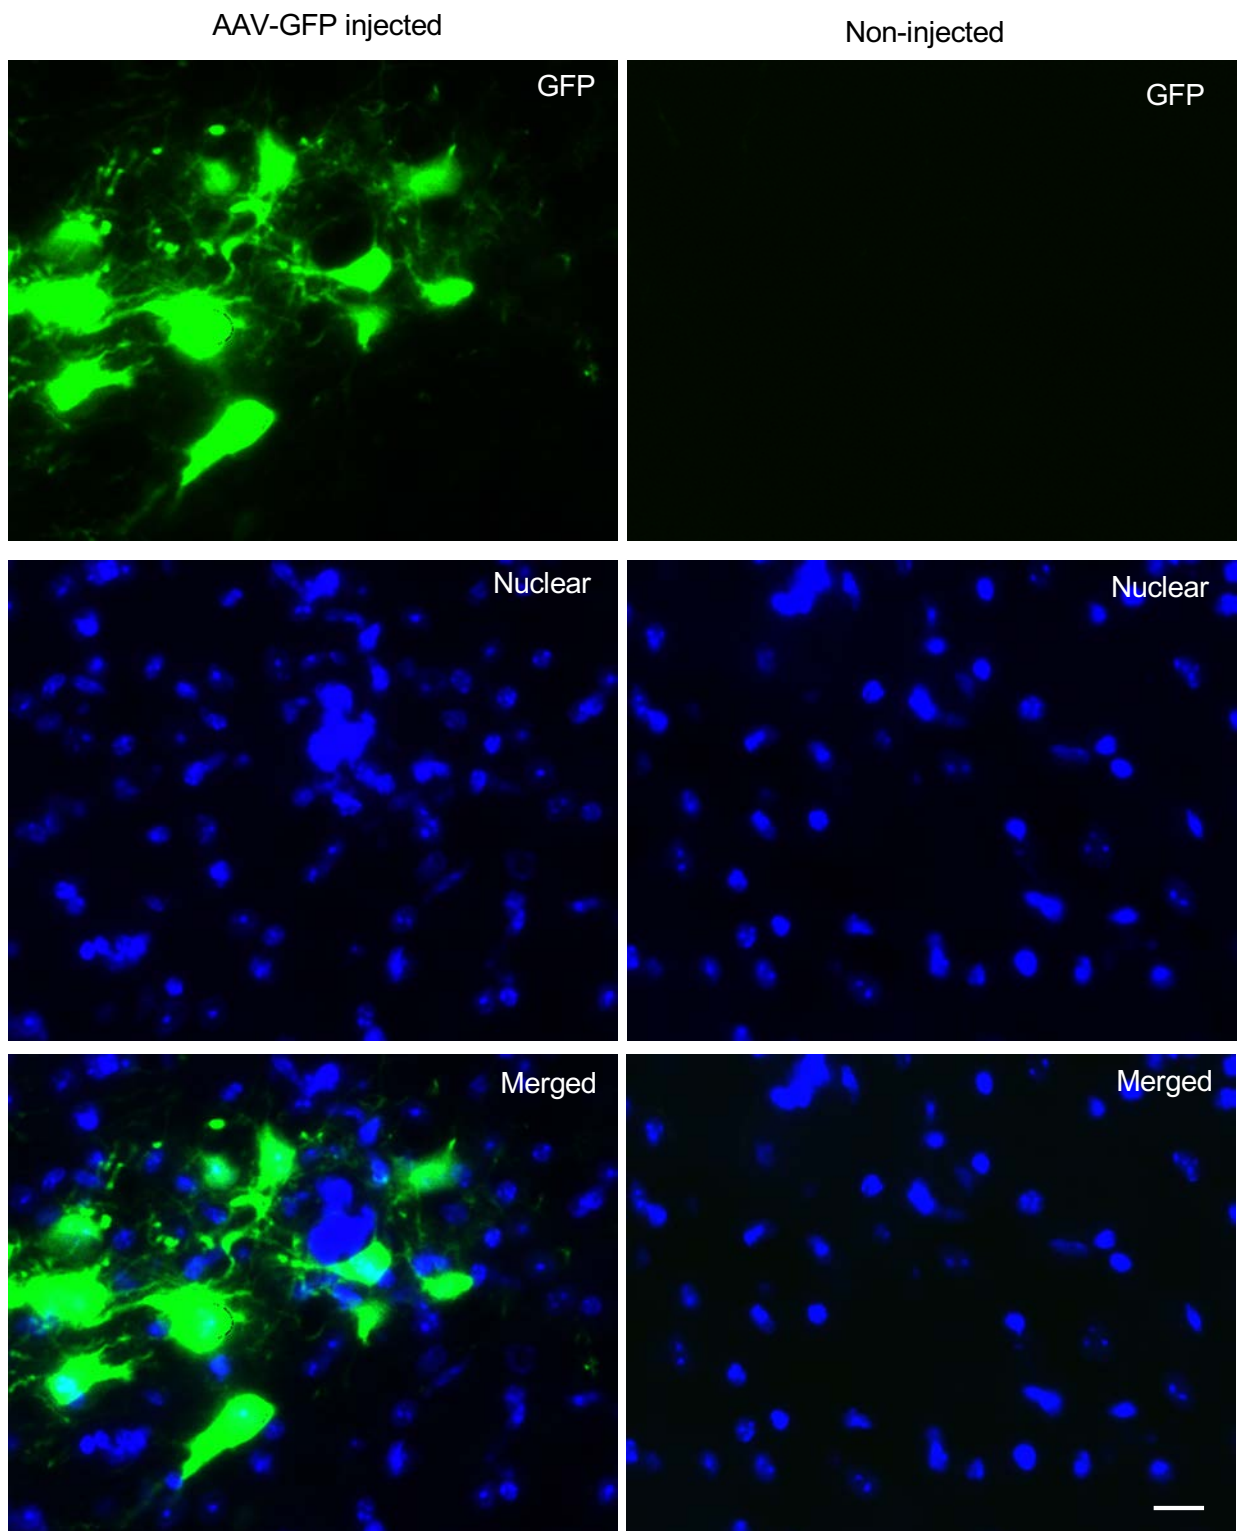

**Supplemental Fig. 3 Immunostaining of the monkey substantial nigra injected with AAV-GFP.** Control: non-injection side. The nuclei were stained with DAPI. Scale bar: 10  $\mu$ m.

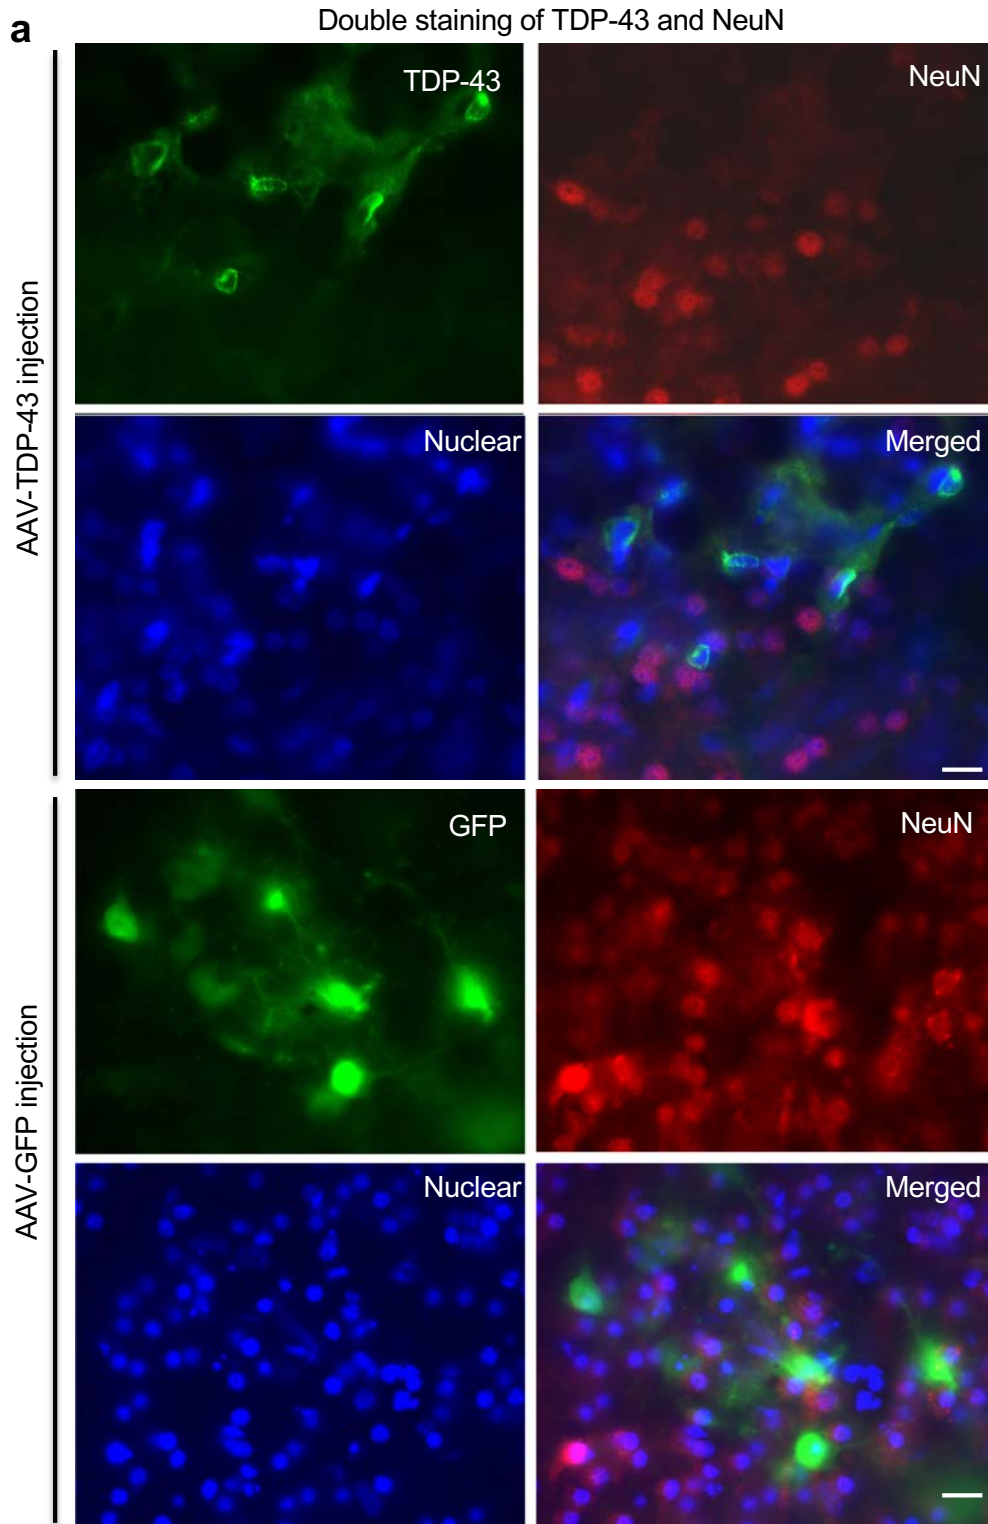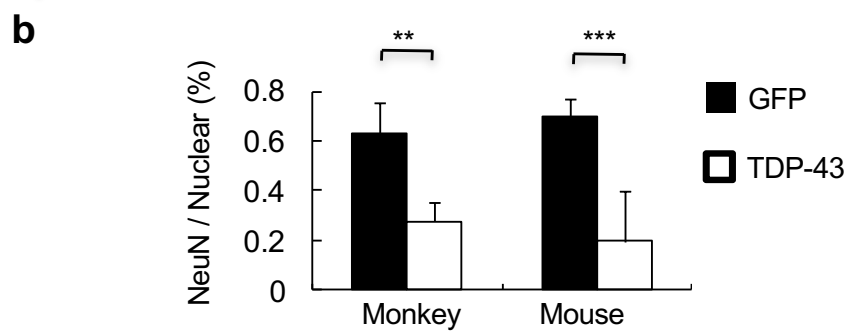

**Supplemental Fig. 4 Double-immunostaining of monkey substantial nigra injected with AAV-TDP-43.** **a** the injected monkey brain was injected using antibodies to TDP-43 and NeuN. The nuclei were stained with DAPI. Scale bars: 10  $\mu$ m. **b** Counting the relative number of NeuN-positive cells per image (40X lens) in the injected monkey or mouse striatum. The results were obtained by counting a total of 120 cells in random six images for each group.

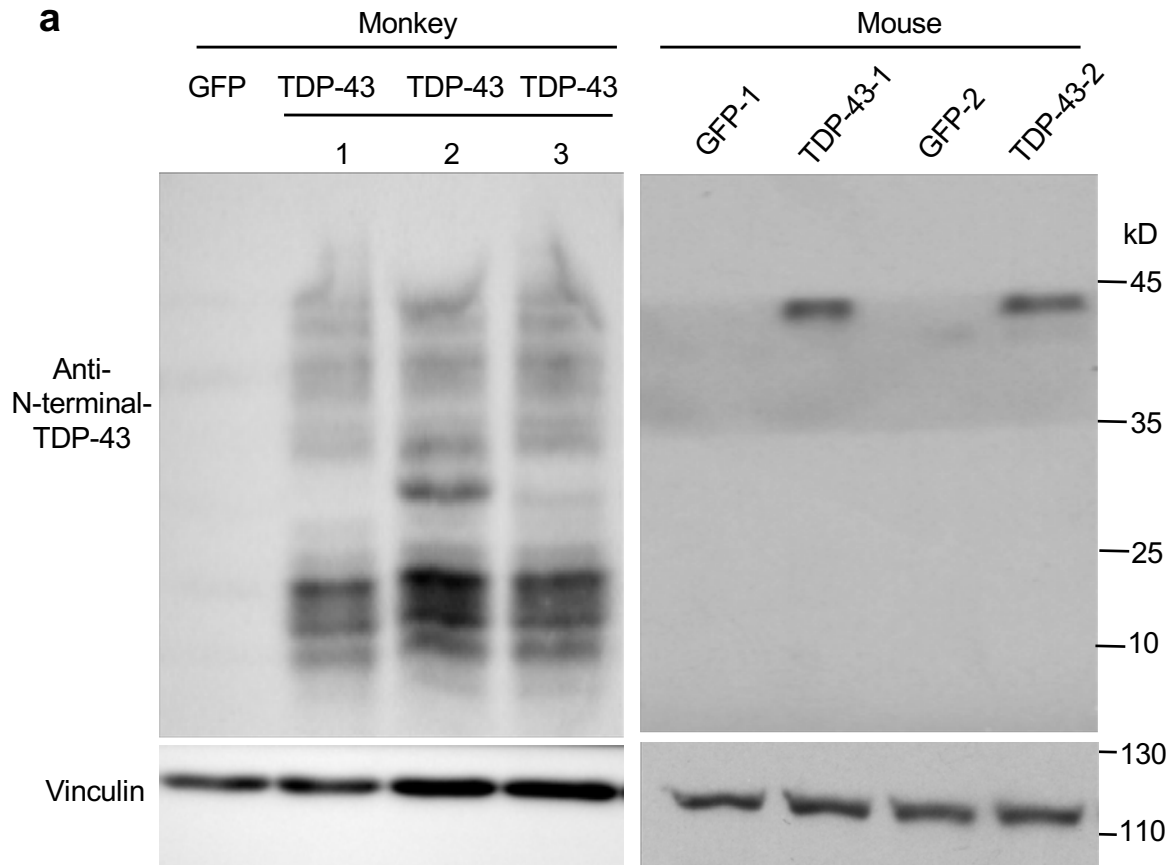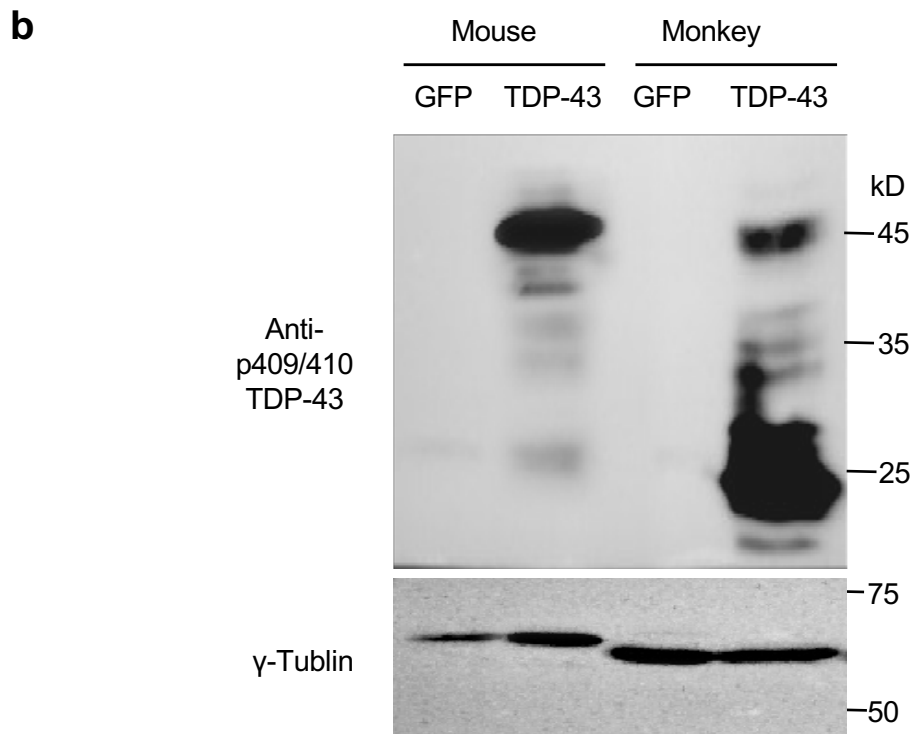

**Supplemental Fig. 5 Detecting transgenic TDP-43 expression in the monkey and mouse brain with an antibody to N-terminal TDP-43. a** Western blotting analysis of the brain substantia nigra tissues of several TDP-43 monkeys and mice that were injected with AAV-GFP or AAV-TDP-43. The blots were probed with the antibody to N-terminal-TDP-43 (1-261 amino acids). **b** Detection of phosphorylated TDP-43 using anti-p409/410 TDP-43 via western blotting. Note that the injected monkey substantia nigra tissues generated much more truncated TDP-43 than the injected mouse tissues.

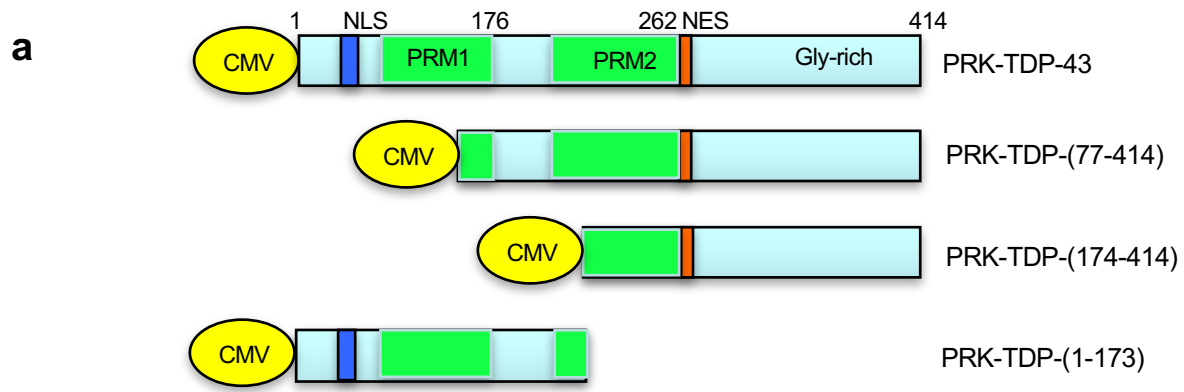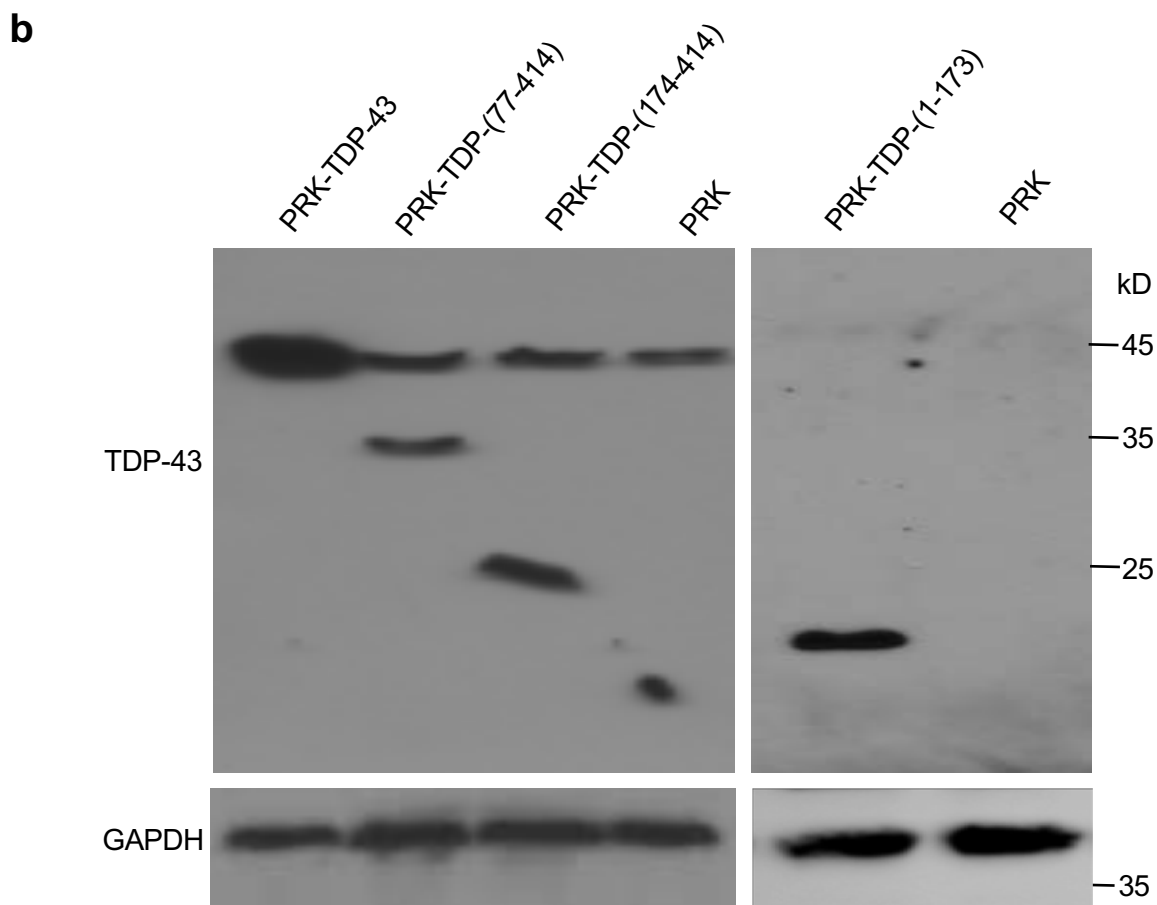

**Supplemental Fig. 6 Generation of vectors expressing TDP-43 C-terminal or N-terminal fragments.** **a** The plasmid DNA structure for expressing full length TDP-43, truncated TDP-(77-414), C-terminal TDP-(174-414), or N-terminal TDP-(1-173) under the CMV promoter in PRK vector. **b** The expression of PRK-TDP-43, PRK-TDP-(77-414), PRK-TDP-(174-414) and PRK-TDP-(1-173) in transfected N2A cells was detected via western blotting.



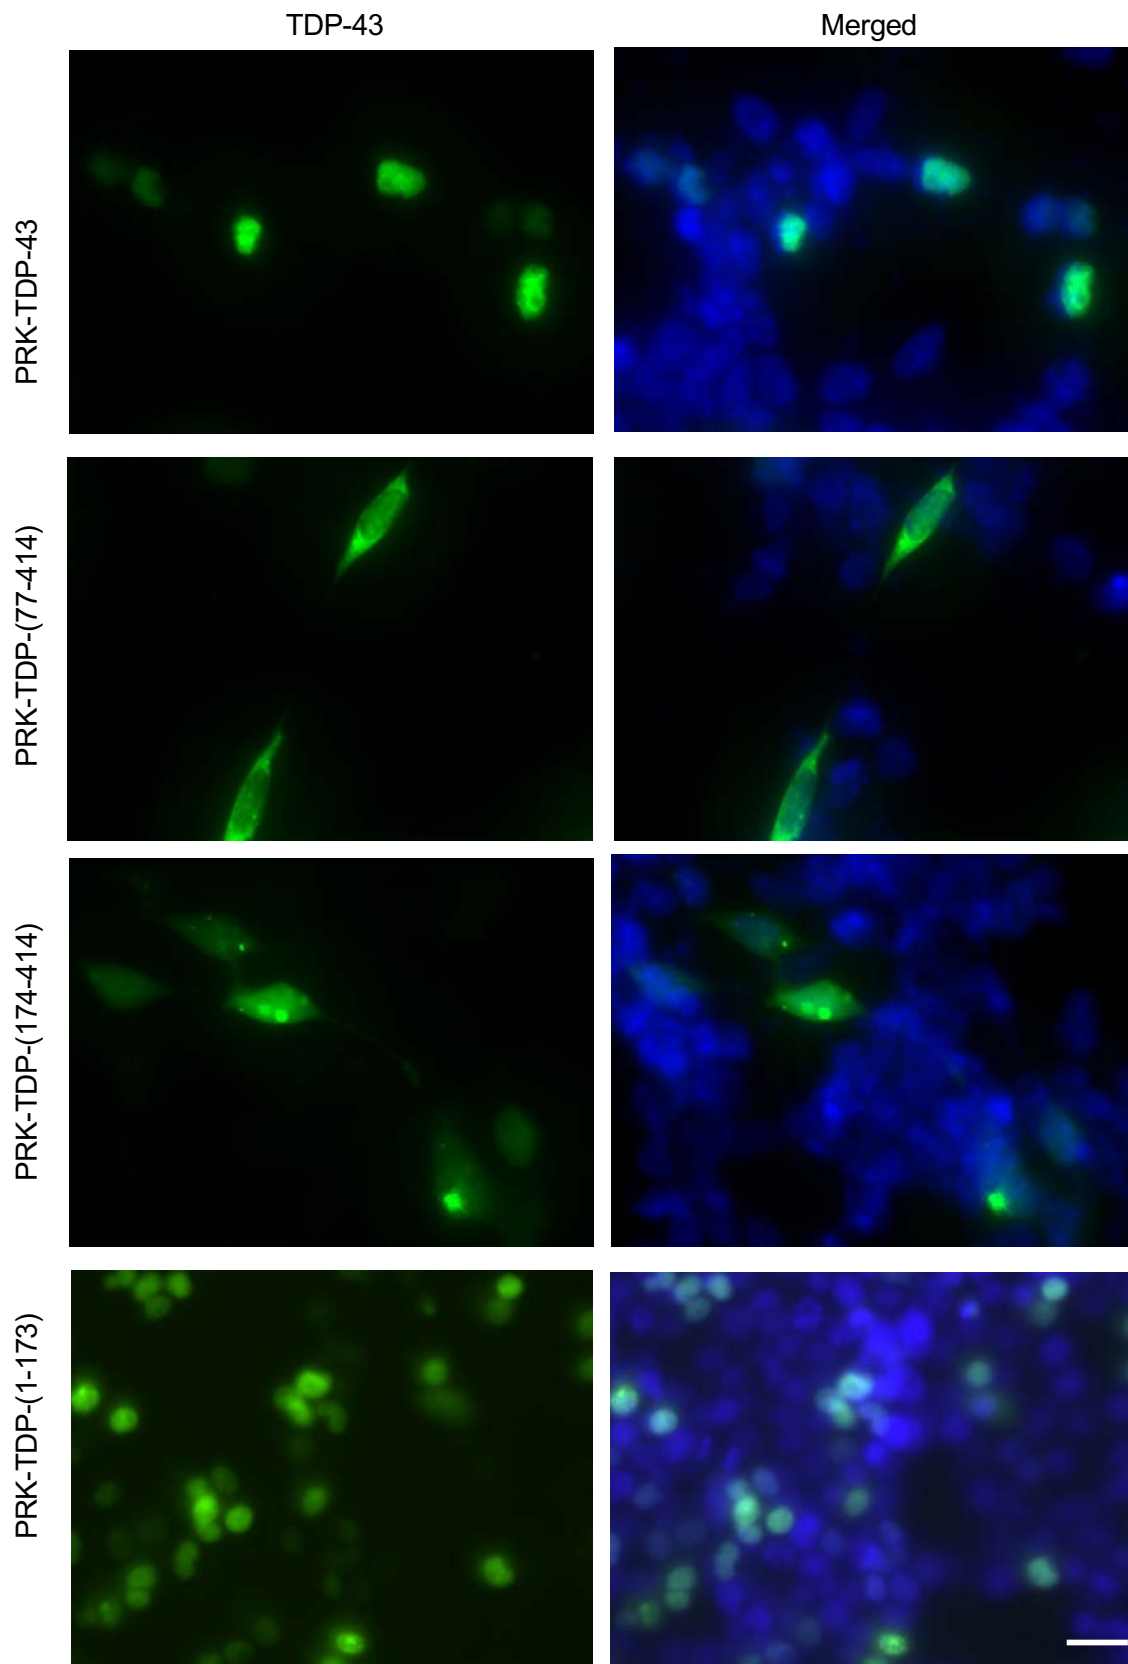

**Supplemental Fig. 7 Cellular localization of the different TDP-43 fragments.** Immunostaining of mouse N2A cells transfected with PRK-TDP-43, PRK-TDP-(77-414), PRK-TDP-(174-414) or PRK-TDP-(1-173) using antibodies that recognized N-terminal (1-261 amino acids) or C-terminal peptide corresponding to residues surrounding Gly400 of TDP-43. The nuclei were stained with DAPI. Scale bar: 10  $\mu$ m.

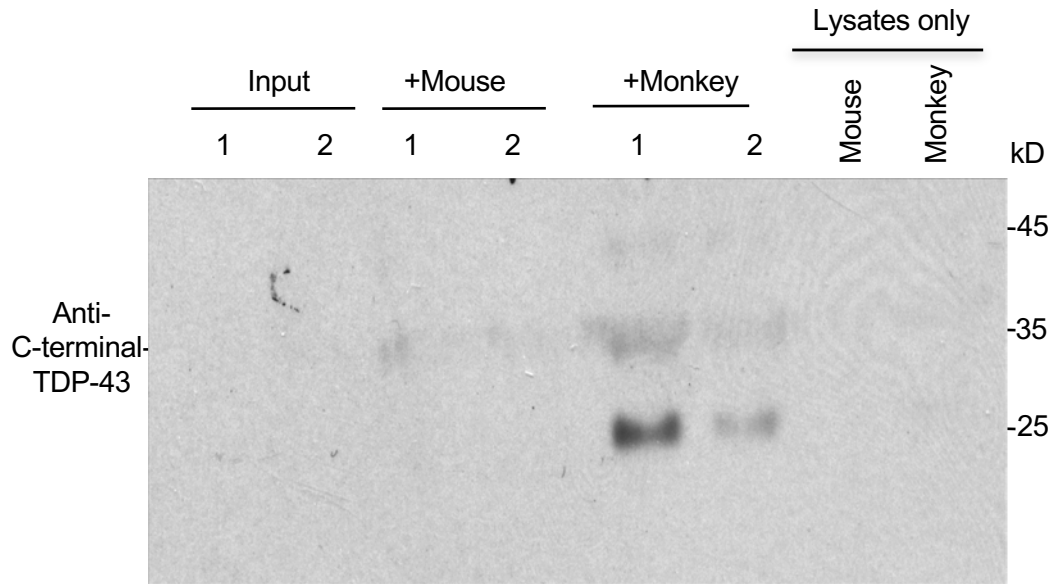

**Supplemental Fig. 8 Detecting C-terminal TDP-43 fragments generated by GST-TDP-43 in the *in vitro* caspase-4 cleavage assay.** Western blotting analysis of GST-TDP-43(M337V) that was incubated with brain homogenate lysate from mouse or monkey brain striatum. The supernatant after precipitating GST-TDP-43 beads was detected by anti-C-terminal-TDP-43 via western blotting.

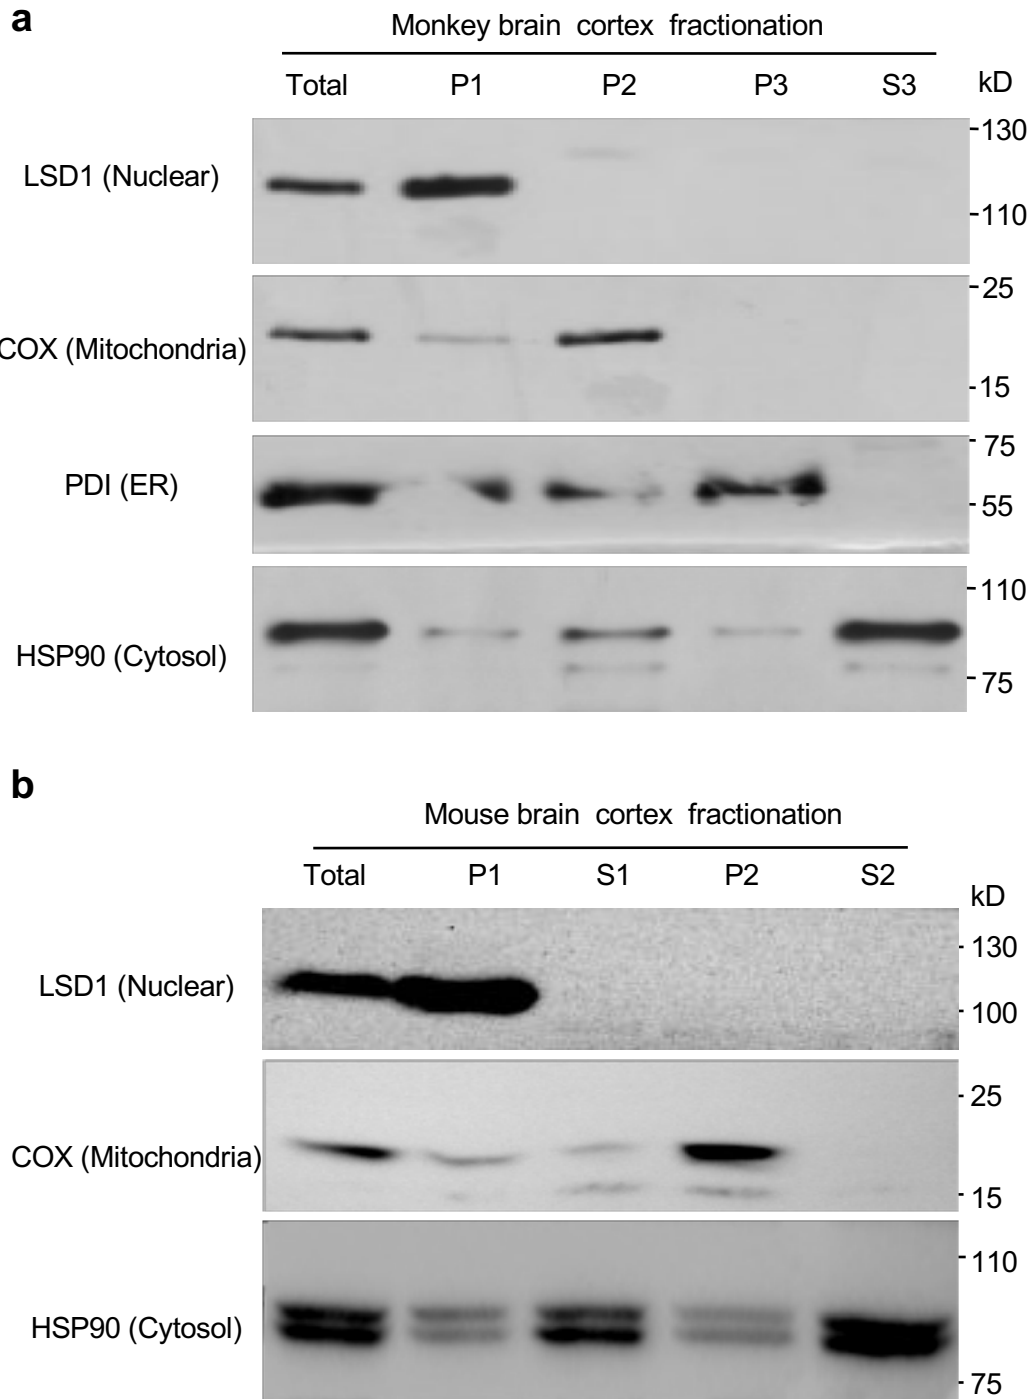

**Supplemental Fig. 9 Subcellular fractionation of the cortex of rhesus monkeys (a) and mice (b).** Western blotting with antibodies to different organelle marker proteins revealing P1, P2, P3 and S3 fractions, which are enriched in different subcellular marker proteins. LSD1: nuclear lysine-specific demethylase 1; COX: mitochondrial complex IV of cytochrome c oxidase subunits; PDI: protein disulfide isomerase in endoplasmic reticulum; HSP90: heat shock protein 90 in cytoplasm.

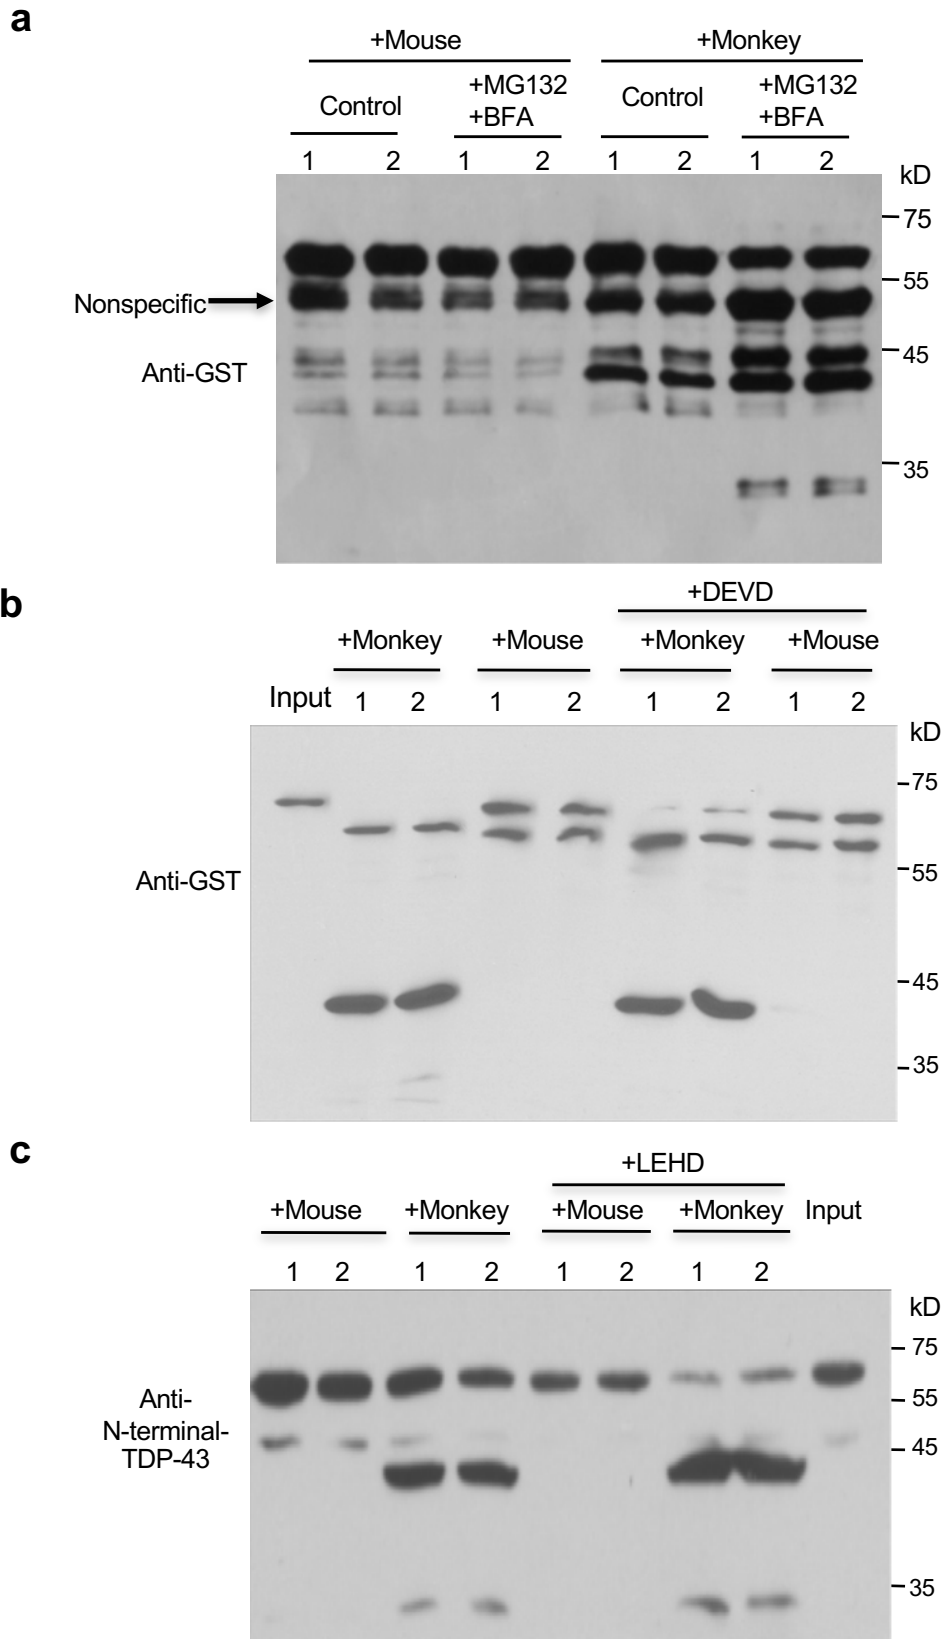

**Supplemental Fig. 10 Inhibition of the UPS and autophagy did not prevent but increased the generation of fragmented TDP-43.** **a** Western blotting analysis of cleaved TDP-43 fragments generated by the monkey brain lysates, MG132 (10  $\mu$ M) and BFA (5  $\mu$ g/ml) were added to the lysates for 16 h or during incubation, and this treatment increased the levels of cleaved TDP-43 by the monkey brain lysates. The blot was probed with antibody to N-terminal TDP-43. **b, c** *In vitro* cleavage assays of TDP-43 with caspase inhibitors. Western blotting analysis of GST-TDP-43(M337V) that was incubated with mouse or monkey brain striatal lysates. The caspase-3 and -7 inhibitor DEVD-fmk (**b**) or caspase-9 inhibitor LEHD-fmk (**c**) was added in the lysates but was unable to block the cleavage of TDP-43. Protein expression was detected by anti-GST or anti-N-terminal-TDP-43.

|                         |                 |                   |                 |               |             |           |           |  |
|-------------------------|-----------------|-------------------|-----------------|---------------|-------------|-----------|-----------|--|
|                         |                 | 5                 | 10              | 15            | 20          | 25        | 30        |  |
| <i>Human caspase-4</i>  | M A E           | G N H R K         | K P L K V       | L E S         | L G K D F   | L T G V L | D N L V   |  |
| <i>Monkey caspase-4</i> | M A E           | G N Q R K         | K P L K M       | L E S         | L G K D F   | L T G V L | D N L V   |  |
| <i>Mouse caspase-11</i> | M A E           | N K H P D         | K P L K V       | L E Q         | L G K E V   | L T E Y L | E K L V   |  |
|                         |                 | 35                | 40              | 45            | 50          | 55        | 60        |  |
| <i>Human caspase-4</i>  | E Q N V L       | N W K E E         | E K K K Y Y D   | A K T E       | D K V R V   | M A D S   |           |  |
| <i>Monkey caspase-4</i> | E Q N V L       | N W K E E         | E K K K Y Y D   | A K T E       | D K V R V   | M A D S   |           |  |
| <i>Mouse caspase-11</i> | Q S N V L       | K L K E E         | D K Q K F N N   | A E R S       | D K R W V   | F V D A   |           |  |
|                         |                 | 65                | 70              | 75            | 80          | 85        | 90        |  |
| <i>Human caspase-4</i>  | M Q E K         | Q R M A G         | Q M L L Q T F F | N I D Q I     | S P N K K   | A H P     |           |  |
| <i>Monkey caspase-4</i> | I Q E K         | Q R M A G         | Q M L L Q T F F | N I D Q I     | S P S K K   | A H L     |           |  |
| <i>Mouse caspase-11</i> | M K K K         | H S K V G         | E M L L Q T F F | S V D P G     | S H H G E   | A N L     |           |  |
|                         |                 | 95                | 100             |               |             | 270       | 275       |  |
| <i>Human caspase-4</i>  | N M E A         | G P P E S G       | . . . . .       | . . . . .     | . . . . .   | W V R D S | P A S L E |  |
| <i>Monkey caspase-4</i> | N M E A         | R P P E S G       | . . . . .       | . . . . .     | . . . . .   | W V R D S | P A S L E |  |
| <i>Mouse caspase-11</i> | E M E E         | - - P E           | - - . . . . .   | . . . . .     | . . . . .   | W I R E S | S K P Q L |  |
|                         |                 | 280               | 285             | 290           | 295         | 300       | 305       |  |
| <i>Human caspase-4</i>  | V A S S Q S     | S E N L E E       | D A V Y K T     | H V E K D F I | A F C S S   |           |           |  |
| <i>Monkey caspase-4</i> | V A S S Q S     | P E N L E E       | D A V Y K T     | H V E K D F I | A F C S S   |           |           |  |
| <i>Mouse caspase-11</i> | C R G V D L P R | N M E A           | D A V K L S     | H V E K D F I | A F Y S T   |           |           |  |
|                         |                 | 310               | 315             | 320           | 325         | 330       | 335       |  |
| <i>Human caspase-4</i>  | T P H N V S     | W R D S T M       | G S I F I T     | Q L I T C F   | Q K Y S W C |           |           |  |
| <i>Monkey caspase-4</i> | T P H N V S     | W R D S T M       | G S V F I T     | Q L I T C F   | Q K Y S W C |           |           |  |
| <i>Mouse caspase-11</i> | T P H H L S     | Y R D K T G       | G S Y F I T     | R L I S C F   | R K H A C S |           |           |  |
|                         |                 | 340               | 345             | 350           | 355         | 360       | 365       |  |
| <i>Human caspase-4</i>  | C H L E E V     | F R K V Q Q S F E | T P R A K A     | Q M P T I     | E R L S     |           |           |  |
| <i>Monkey caspase-4</i> | C H L E E V     | F R K V Q Q S F E | T P R A K A     | Q M P T I     | E R L S     |           |           |  |
| <i>Mouse caspase-11</i> | C H L F D I     | F L K V Q Q S F E | K A S I H S     | Q M P T I     | D R A T     |           |           |  |

**Supplemental Fig. 11 Comparison of amino acid sequences of human caspase-4, monkey caspase-4, and mouse caspase-11.**

**a**

| siRNA for caspase-4 | Target sequence         |
|---------------------|-------------------------|
| siCAS4-1            | GUGUAGAUGUAGAAGAGAAtt   |
| siCAS4-2            | AAGUGGCCUCUUCACAGUCAUtt |

**b**

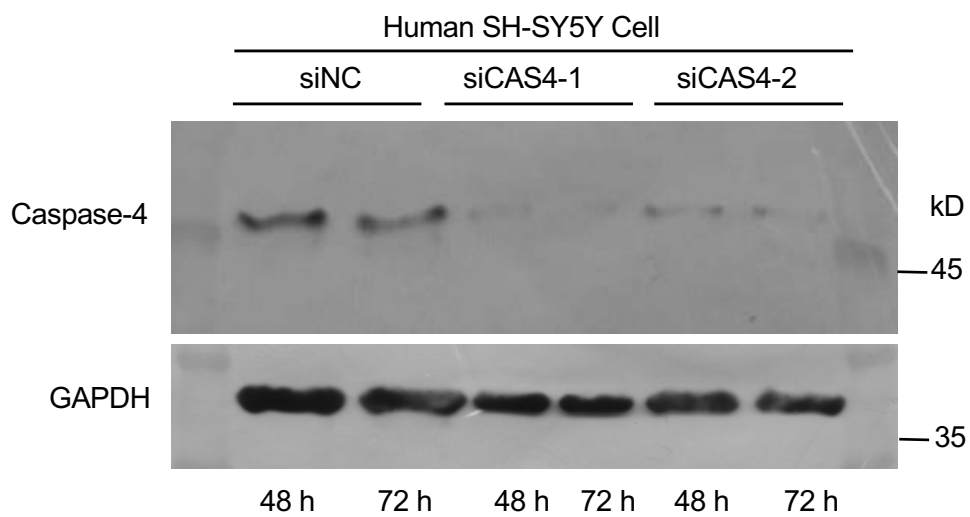

**Supplemental Fig. 12 Suppressing endogenous caspase-4 via siRNA in human SH-SY5Y cells.** **a** The target sequences of siRNA to caspase-4. **b** Western blotting analysis of human SH-SY5Y cells transfected after 48 h or 72 h showing that knockdown of caspase-4 via siRNA (siCAS4-1 or siCAS4-2) decreased the expression of endogenous caspase-4. Control is a scramble siRNA (siNC).

**Supplemental Table S1** Postmortem brain tissues used for investigation

| <b>CASE</b> | <b>Case Number</b> | <b>Frozen Tissue Provided</b> | <b>Paraffin Sections Provided</b> | <b>PMI (hr)</b> | <b>Age at Onset</b> | <b>Age at Death</b> | <b>Duration</b> | <b>ApoE</b> | <b>Race /Sex</b> |
|-------------|--------------------|-------------------------------|-----------------------------------|-----------------|---------------------|---------------------|-----------------|-------------|------------------|
| Control     | E06-45             | F                             | F                                 | 6.5             |                     | 46                  |                 | E3/3        | wf               |
| Control     | E06-114            | F                             | F                                 | 6.5             |                     | 53                  |                 | E4/4        | bm               |
| Control     | E08-101            | F,sp cd                       | F,sp cd                           | 11.5            |                     | 78                  |                 | E3/3        | wf               |
| Control     | E08-137            | F,sp cd                       | F,sp cd                           | 15.5            |                     | 92                  |                 | E3/3        | wf               |
| Control     | E10-142            | F,sp cd                       | F,sp cd                           | 5.5             |                     | 94                  |                 | E3/3        | wm               |
| ALS         | E04-56             | F                             | F,sp cd                           | 9.5             | 70                  | 71                  | ~1              | E2/3        | wm               |
| ALS         | E08-86             | F                             | F,sp cd                           | 13              | 71                  | 71                  | 6 mos           | E3/3        | wm               |
| ALS         | E09-35             | F,sp cd                       | F,sp cd                           | 6               | 63                  | 67                  | 3.5             | E3/3        | wf               |
| ALS         | E11-75             | F,sp cd                       | F,sp cd                           | 11              | 66                  | 68                  | 2               | E3/3        | wm               |
| ALS         | E11-81             | F,sp cd                       | F,sp cd                           | 12              | 69                  | 74                  | 5               | E3/3        | wf               |
